# Supplementary material for: Efficiency metrics for ocean alkalinity enhancement under responsive and prescribed atmosphere conditions
Source: Copernicus journal article supplement (doi:10.5194/egusphere-2024-2150), 2024-07-24
Supplement: Supplementary file 1 [file egusphere-2024-2150-supplement.pdf]

1 Supplement to: "Efficiency metrics for ocean alkalinity  
2 enhancement under responsive and prescribed atmosphere  
3 conditions"

4 Michael D. Tyka

5 July 11, 2024

6 **1 Analytical equality of  $\eta(t)$  and direct atmosphere removal**

7 Consider a simple box model comprising an atmosphere box of finite volume, and an ocean mixed  
8 layer box, as shown in Figure S1. The intent is not to create a model with detailed realism but to  
9 demonstrate the consequences of modelling the atmosphere to be finite, and therefore change its  
10  $pCO_2$  in response to fluxes of  $CO_2$  across the air-sea interface.

11 Firstly, the flux of  $CO_2$  across the air-water interface is typically modelled as proportional to  
12 the partial pressure difference

$$F_{CO_2} = k_w \alpha (pCO_2^{atm} - pCO_2^{ocn}) = k_w \alpha \Delta pCO_2, \quad (1)$$

13 where  $\alpha$  is the solubility of  $CO_2$  in seawater [ $\approx 34 \text{ mol/m}^3/\text{atm}$ ] and  $k_w$  is the gas transfer  
14 velocity [m/s]. Thus, the total amount of dissolved inorganic carbon (DIC) in the mixed layer and  
15 the atmosphere respectively change according to

$$\frac{dC^{ocn}}{dt} = -\frac{dC^{atm}}{dt} = F_{CO_2} A = k_w \alpha A \Delta pCO_2 = \Psi \Delta pCO_2 \quad (2)$$

16 where  $A$  is the surface area over which gas exchange occurs. For later convenience,  $\Psi$  is defined  
17 here as  $k_w \alpha A$ . The atmospheric partial pressure  $pCO_2^{atm}$  is directly proportional to the total  
18 amount of  $CO_2$  in the atmosphere  $C^{atm}$  in [mol]

$$pCO_2^{atm} = V_m p \frac{C^{atm}}{V_{atm}}, \quad (3)$$

19 where  $V_m$  is the molar volume of gas ( $0.024 \text{ m}^3/\text{mol}$ ) and  $p$  is the atmospheric pressure. Or as  
20 a differential:

$$\frac{dpCO_2^{atm}}{dC^{atm}} = \frac{V_m p}{V_{atm}} \quad (4)$$

21 In the ocean (specifically in the mixed layer, "ml") the differential relationship between  $pCO_2$   
22 and  $C$ , for small changes in either, is

$$\frac{dpCO_2^{ocn}}{dC^{ocn}} = \frac{1}{\alpha V_{ml}} \frac{\partial[CO_2]}{\partial[DIC]} \quad (5)$$

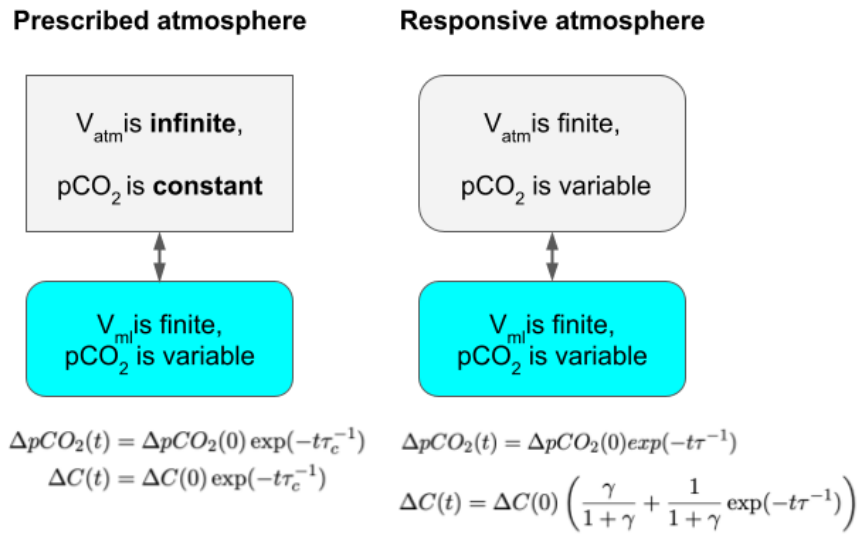

Figure S1: Two simple box models, one with a static, prescribed atmosphere and one with a reactive finite-volume atmosphere. The resulting decay laws for an initial pulse of  $\text{CO}_2$  added to to ocean ( $\Delta C(0)$ ) and and initial pulse of  $p\text{CO}_2(0)$  are given below.

23 where  $[DIC]$  is the concentration of total dissolved carbon and  $\alpha$  is the solubility of  $CO_2$  in  
 24 seawater (Zeebe and Wolf-Gladrow, 2001). This relation follows from the following differential  
 25 relationships  $d[DIC] = dC/V_{ml}$  and  $dpCO_2 = \frac{1}{\alpha}d[CO_2]$ .

26 Now the changes in partial pressure in the atmosphere and ocean mixed layer can be written  
 27 using the chain rule ( $\frac{dpCO_2}{dt} = \frac{dC}{dt} \cdot \frac{dpCO_2}{dC}$ ) as:

$$\frac{dpCO_2^{atm}}{dt} = -\Psi \Delta pCO_2 \frac{dpCO_2^{atm}}{dC^{atm}} \quad (6)$$

$$\frac{dpCO_2^{oce}}{dt} = \Psi \Delta pCO_2 \frac{dpCO_2^{ocn}}{dC^{ocn}} \quad (7)$$

28 The partial pressure difference between the two reservoirs thus evolves as

$$\frac{d\Delta pCO_2}{dt} = \frac{dpCO_2^{atm}}{dt} - \frac{dpCO_2^{oce}}{dt} = -\Psi \left[ \frac{dpCO_2^{atm}}{dC^{atm}} + \frac{dpCO_2^{ocn}}{dC^{ocn}} \right] \Delta pCO_2 \quad (8)$$

$$= -\tau^{-1} \Delta pCO_2 \quad (9)$$

29 This ODE in  $\Delta pCO_2$  is readily solved - any partial pressure differences evolve in an exponential  
 30 fashion

$$\Delta pCO_2(t) = \Delta pCO_2(0) \exp(-t\tau^{-1}) \quad (10)$$

31 with a characteristic timescale

$$\tau = \Psi^{-1} \left( \frac{dpCO_2^{atm}}{dC^{atm}} + \frac{dpCO_2^{ocn}}{dC^{ocn}} \right)^{-1} \quad (11)$$

32 Note that the frequently taken assumption that atmospheric  $pCO_2$  is constant, corresponds to  
 33 the assumption that  $V_{atm} = \infty$ , in which case  $\frac{dpCO_2^{atm}}{dC^{atm}} = 0$ , i.e. it assumes an atmosphere which  
 34 can accommodate arbitrary movement of  $CO_2$  in or out of it, without a change in  $pCO_2^{atm}$ . In this  
 35 case the e-folding time simplifies to

$$\tau_c = \Psi^{-1} \left( \frac{dpCO_2^{ocn}}{dC^{ocn}} \right)^{-1} \quad (12)$$

36 denoted here as  $\tau_c$  for "constant". It is worth noting that the timescale obtained under constant  
 37 atmosphere assumptions  $\tau_c$  is always a little larger than  $\tau$  due to the missing  $\frac{dpCO_2^{atm}}{dC^{atm}}$  term. The  
 38 ODE for the  $pCO_2$  difference simplifies to the often used gas-exchange expression (Zeebe and Wolf-  
 39 Gladrow, 2001) after substitution of  $\Psi$  and  $\frac{dpCO_2^{ocn}}{dC^{ocn}}$ :

$$\frac{d\Delta pCO_2}{dt} = -\frac{k_w}{z_{ml}} \frac{\partial[CO_2]}{\partial[DIC]} \Delta pCO_2 = -\tau_c^{-1} \Delta pCO_2 \quad (13)$$

40 where the depth of the mixed layer  $z_{ml} = V_{ml}/A$ .

## 41 1.1 Differences between reference and perturbed simulations

42 In general, the state of the mixed layer will not be in equilibrium with the atmosphere. Some areas  
 43 may be taking in  $\text{CO}_2$ , some may be outgassing. The  $p\text{CO}_2^{\text{atm}}$  may be changing. However the effects  
 44 of a small perturbation can be studied by taking the difference between a reference simulation and  
 45 an otherwise identical simulation that has a perturbation applied to it.

46 Since the ODEs describing changes in  $\Delta p\text{CO}_2$  in both simulations (let's say A and B) are linear,  
 47 the same kinetics also describe any differences between two simulations, say,  $\Delta p\text{CO}_2^A$  and  $\Delta p\text{CO}_2^B$ :

$$\frac{d}{dt}(\Delta p\text{CO}_2^A - \Delta p\text{CO}_2^B) = \frac{d\Delta p\text{CO}_2^A}{dt} - \frac{d\Delta p\text{CO}_2^B}{dt} = -\tau^{-1}(\Delta p\text{CO}_2^A - \Delta p\text{CO}_2^B) \quad (14)$$

48 Therefore, from here on I assume that  $\Delta p\text{CO}_2$  and  $\Delta C$  refer to the difference between a per-  
 49 turbed simulation and a reference simulation, for example:

$$\Delta p\text{CO}_2 = (\Delta p\text{CO}_2^A - \Delta p\text{CO}_2^B) = (\Delta p\text{CO}_2^{\text{atm},A} - \Delta p\text{CO}_2^{\text{ml},A}) - (\Delta p\text{CO}_2^{\text{atm},B} - \Delta p\text{CO}_2^{\text{ml},B}) \quad (15)$$

## 50 1.2 Equilibration of $\text{CO}_2$ inventories under reactive atmospheres

51 How does a small  $\text{CO}_2$  deficit of size  $\Delta C(0)$  induced in the ocean reservoir evolve in time under  
 52 finite, responsive atmospheres? If the perturbation is small then an initial perturbation  $\Delta C(0)$   
 53 causes a initial change in  $p\text{CO}_2^{\text{ocn}}$  of

$$\Delta p\text{CO}_2^{\text{ocn}}(0) = \frac{dp\text{CO}_2^{\text{ocn}}}{dC^{\text{ocn}}} \Delta C(0) \quad (16)$$

54 This initial partial pressure difference will then cause transfer of  $\text{CO}_2$  from the atmosphere to  
 55 the ocean. The  $\Delta p\text{CO}_2$  will equilibrate with the exponential law given by equation 10. The total  
 56 rate of transfer of  $\text{CO}_2$  between the atmosphere and the ocean (Equation 2) is proportional to  
 57  $\Delta p\text{CO}_2$ , given by Equation 10:

$$\begin{aligned} \frac{dC}{dt} &= \Psi \Delta p\text{CO}_2(t) \\ &= \Psi \Delta p\text{CO}_2^{\text{ocn}}(0) \exp(-t\tau^{-1}) \\ &= \Delta C(0) \Psi \frac{dp\text{CO}_2^{\text{ocn}}}{dC^{\text{ocn}}} \exp(-t\tau^{-1}) \end{aligned} \quad (17)$$

58 The cumulative transfer of  $\text{CO}_2$  is then expressed by the integral of the above rate. Subtract-  
 59 ing this integral from the initial perturbation  $\Delta C(0)$ , the time evolution of the ocean inventory  
 60 perturbation in the ocean is obtained:

$$\Delta C(t) = \Delta C(0) - \int_0^t \frac{dC}{dt} dt \quad (18)$$

61 Evaluating the integral

$$\begin{aligned} \Delta C(t) &= \Delta C(0) - \Delta C(0) \Psi \frac{dp\text{CO}_2^{\text{ocn}}}{dC^{\text{ocn}}} \tau [1 - \exp(-t\tau^{-1})] \\ &= \Delta C(0) - \Delta C(0) \frac{\frac{dp\text{CO}_2^{\text{ocn}}}{dC^{\text{ocn}}}}{\frac{dp\text{CO}_2^{\text{atm}}}{dC^{\text{atm}}} + \frac{dp\text{CO}_2^{\text{ocn}}}{dC^{\text{ocn}}}} [1 - \exp(-t\tau^{-1})] \end{aligned} \quad (19)$$

62 where  $\Psi$  conveniently cancels. Simplifying yields:

$$\Delta C(t) = \Delta C(0) \left( \frac{\gamma}{1+\gamma} + \frac{1}{1+\gamma} \exp(-t\tau^{-1}) \right) \quad (20)$$

63 where  $\gamma$  expresses the ratio of the capacities of the two interacting reservoirs.

$$\gamma = \frac{dpCO_2^{atm}}{dC^{atm}} \bigg/ \frac{dpCO_2^{ocn}}{dC^{ocn}} = \frac{V_m p \alpha V_{ml}}{V_{atm}} \frac{\partial[DIC]}{\partial[CO_2]} \quad (21)$$

64 As expected, under finite, responsive atmosphere conditions, some fraction of the initial pulse  
 65 will always remain in the reservoir it was induced in, even once the  $pCO_2$  values have reached  
 66 equilibrium. The fraction that will move to the other reservoir is  $\frac{1}{1+\gamma}$ , while the fraction that will  
 67 remain in the ocean is  $\frac{\gamma}{1+\gamma}$ .

### 68 1.3 Equilibration of $CO_2$ inventories under prescribed atmospheres

69 The non-reactive atmosphere conditions, where the atmosphere is modelled with a constant or  
 70 prescribed  $pCO_2^{atm}$ , correspond to the assumption that  $V_{atm} = \infty$ . In that case,  $\gamma \rightarrow 0$  and  
 71  $(1 + \gamma)^{-1} \rightarrow 1$ . Under these circumstances, the evolution of a  $\Delta C(0)$  pulse is a simple exponential  
 72 decay with the simpler e-folding time  $\tau_c$  given by Equation ?? and that will decay all the way to  
 73 zero.

$$\begin{aligned} \Delta pCO_2(t) &= \Delta pCO_2(0) \exp(-t\tau_c^{-1}) \\ \Delta C(t) &= \Delta C(0) \exp(-t\tau_c^{-1}) \\ \frac{\Delta dC(t)}{dt} &= -\Delta C(0)\tau_c^{-1} \exp(-t\tau_c^{-1}) \end{aligned} \quad (22)$$

74 This is basis of the  $\eta(t)$  curve obtained in OAE efficiency simulations(Tyka et al., 2022; He and  
 75 Tyka, 2023; Zhou et al., 2024; Suselj et al., 2024).

$$\eta(t) = 1 - \frac{\Delta C(t)}{\Delta C(0)} = 1 - \exp(-t\tau_c^{-1}) \quad (23)$$

### 76 1.4 Equivalence

77 We have seen that the function  $\eta(t)$ , determined under constant  $pCO_2^{atm}$  conditions, does not  
 78 properly describe the actual movement of  $CO_2$  from the atmosphere into the ocean under realistic  
 79 conditions (where feedback of the atmosphere is taken into account). This raises the question, what  
 80 does  $\eta(t)$  represent, if anything? To illuminate this question, consider the following scenario. How  
 81 would the total inventory of  $CO_2$  in the atmosphere evolve, under realistic reactive-atmosphere  
 82 conditions, if  $CO_2$  was directly removed from the atmosphere at a rate proportional to  $d\eta(t)/dt$ ,  
 83 using a terrestrial technology like DAC, instead of indirectly by applying an alkalinity pulse to the  
 84 ocean?

85 Specifically, the rate of carbon removal out of the atmosphere would be

$$\frac{d\Delta C}{dt} = \Delta C(0) \frac{d\eta(t)}{dt} = \Delta C(0)\tau_c^{-1} \exp(-t\tau_c^{-1}) \quad (24)$$

86 where  $\Delta C(0)$  is a scaling factor that sets the total, eventual amount of  $CO_2$  removed. This  
 87 steady removal of  $CO_2$  from the atmosphere lowers the  $pCO_2$  of the atmosphere at a rate of

$$\frac{dpCO_2^{atm}}{dt} = \frac{dpCO_2^{atm}}{dC} \Delta C(0) \tau_c^{-1} \exp(-t\tau_c^{-1}) \quad (25)$$

88 Since the atmosphere now develops a  $\Delta pCO_2$  deficit, relative to the ocean, the ocean would  
 89 react and degas into to the atmosphere (remember all  $\Delta$ s are differences between a reference and  
 90 a perturbed simulation). The rate of  $\Delta pCO_2$  change therefore would be given by the regular gas  
 91 exchange ODE (Equation 9) which describes the ongoing ocean-atmosphere equilibration plus the  
 92 bias induced by the  $CO_2$  removal process (Equation 25).

$$\frac{d\Delta pCO_2}{dt} = -\tau^{-1} \Delta pCO_2 + \frac{dpCO_2^{atm}}{dC} \Delta C(0) \tau_c^{-1} \exp(-t\tau_c^{-1}) \quad (26)$$

93 This ODE is of the form  $y'(t) = gy(t) - mh \exp(th)$  with the solution  $y(t) = c_1 \exp(gt) +$   
 94  $\frac{hm}{g-h} \exp(ht)$ . The initial condition for this linear ODE is  $\Delta pCO_2(0) = 0$  since at the moment the  
 95 removal starts, the reference and perturbed states are equal. This implies in the generalized form  
 96 above  $y(t) = 0$  and therefore the constant  $c_1 = -\frac{hm}{g-h}$ . Hence  $y(t) = -\frac{hm}{g-h} \exp(gt) + \frac{hm}{g-h} \exp(ht) =$   
 97  $\frac{hm}{g-h} (\exp(ht) - \exp(gt))$

98 Substituting the placeholders  $g$ ,  $h$  and  $m$ :

$$\begin{aligned} \Delta pCO_2^{atm}(t) &= \Delta C(0) \left( \frac{dpCO_2^{atm}}{dC^{atm}} \right) \frac{\tau_c^{-1}}{\tau^{-1} - \tau_c^{-1}} [\exp(-t\tau_c^{-1}) - \exp(-t\tau^{-1})] \\ &= \Delta C(0) \frac{\tau_c^{-1}}{\Psi} [\exp(-t\tau_c^{-1}) - \exp(-t\tau^{-1})] \end{aligned} \quad (27)$$

99 Given this trajectory of  $\Delta pCO_2$ , what is the combined effect on total atmospheric  $CO_2$  inventory,  
 100 i.e. the sum of direct removal and ocean reactance ? The total rate of change is the sum of the  
 101 the direct  $CO_2$  removal rate (Equation 24) and the rate due to gas exchange between ocean and  
 102 atmosphere (due to the imbalance of  $\Delta pCO_2$ ):

$$\frac{d\Delta C^{atm}}{dt} = \Delta C(0) \tau_c^{-1} \exp(-t\tau_c^{-1}) - \Psi \Delta pCO_2(t) \quad (28)$$

103 Substituting the expression for  $\Delta pCO_2^{atm}(t)$  from Equation 27:

$$\begin{aligned} \frac{d\Delta C^{atm}}{dt} &= \Delta C(0) \tau_c^{-1} \exp(-t\tau_c^{-1}) - \Delta C(0) \tau_c^{-1} [\exp(-t\tau_c^{-1}) - \exp(-t\tau^{-1})] \\ &= \Delta C(0) \tau_c^{-1} \exp(-t\tau^{-1}) \\ &= \Delta C(0) \Psi \frac{dpCO_2^{ocn}}{dC^{ocn}} \exp(-t\tau^{-1}) \end{aligned} \quad (29)$$

104 This net rate of change in atmospheric carbon inventory equals precisely that obtained earlier  
 105 when considering a a pulsed DIC deficit in the ocean, Equation (17). This result clarifies the exact  
 106 meaning of the  $\eta(t)$  OAE efficiency curve: The OAE curve of an *instantaneously* induced ocean-  
 107 based DIC deficit (obtained under artificial, non-reactive conditions), gives the progression of the  
 108 equivalent *gradual* removal of  $CO_2$  directly from the atmosphere (under real, responsive atmosphere  
 109 conditions), which would result in the same reduction in net atmospheric carbon inventory.

## 110 1.5 Calculating $\eta(t)$ from a coupled simulation

111 When simulating OAE under responsive atmospheres or earth system models, it is still useful  
 112 to calculate  $\eta(t)$ , especially for purposes of comparing different negative emissions technologies  
 113 and calculating negative emission credits. The directly measured change in the ocean inventory  
 114 unfortunately conflates the effect of the OAE intervention and the subsequent feedback. Therefore  
 115 a correction is necessary which can be used to factor out the effect of reservoir feedback. Schwinger  
 116 et al. (2024) proposed a simple simulation setup to calculate this correction, which allows the  
 117 conversion between the two carbon flows under the two different simulation conditions: First one  
 118 simulates the fully coupled system with the OAE intervention. Then one conducts an additional  
 119 reference simulation in which the atmosphere  $pCO_2$  is prescribed at the exact trajectory obtained in  
 120 the fully-coupled simulation with the OAE intervention. However, in the new reference simulation  
 121 no OAE is performed - only the atmospheric  $pCO_2$  is prescribed.

122 We can show below, using the the two-box model, that the difference in ocean inventory between  
 123 these two simulations indeed equals the  $\eta(t)$  value, had the OAE been simulated under prescribed  
 124 atmosphere in the first place.

125 The rate of  $CO_2$  transfer due to an OAE pulse under responsive atmosphere is Equation 17

$$\frac{dC^{ocn}}{dt} = \Delta C(0)\Psi \frac{dpCO_2^{ocn}}{dC^{ocn}} \exp(-t\tau^{-1}), \quad (30)$$

126 where  $\Delta C(0)$  gives the initial DIC deficit. But under prescribed conditions the rate is given by  
 127 Equation 22

$$\frac{d\Delta C^{ocn}}{dt} = -\Delta C(0)\tau_c^{-1} \exp(-t\tau_c^{-1}) \quad (31)$$

128 The correction required is equal to the difference of the two rates, i.e. the purely reactionary  
 129 part of the carbon flux caused by the atmosphere feedback equals:

$$\frac{dC^{Feedback}}{dt} = \Delta C(0)\Psi \frac{dpCO_2^{ocn}}{dC^{ocn}} [\exp(-t\tau^{-1}) - \exp(-t\tau_c^{-1})] \quad (32)$$

130 Now consider the reference simulation with the  $pCO_2$  prescribed at the trajectory from the  
 131 OAE-perturbed coupled-simulation. In this new reference simulation, the difference in atmospheric  
 132  $pCO_2$  compared to what it would have been without the prescription is equal to the change in  
 133  $pCO_2$  caused by OAE in the fully-coupled simulation. That change is equal to the rate of  $CO_2$   
 134 transfer caused by OAE (from Equation 20) times  $dpCO_2^{atm}/dC^{atm}$ , i.e.

$$\frac{d\Delta pCO_2^{atm}}{dt} = -\frac{dpCO_2^{atm}}{dC^{atm}} \frac{dC^{ocn}}{dt} = \Delta C(0)\Psi \frac{dpCO_2^{atm}}{dC^{atm}} \frac{dpCO_2^{ocn}}{dC^{ocn}} \exp(-t\tau^{-1}) \quad (33)$$

135 In this new reference simulation there will be offgassing of  $CO_2$  from the ocean to the atmosphere  
 136 (relative to a completely unperturbed simulation), because the prescribed atmospheric  $pCO_2$  is  
 137 lower than it would have been otherwise. The total air-sea difference  $\Delta pCO_2$  will then evolve  
 138 according to the difference between rates of change of the atmosphere and the ocean:

$$\frac{d\Delta pCO_2}{dt} = -\tau_c^{-1}\Delta pCO_2 - \Delta C(0)\Psi \frac{dpCO_2^{atm}}{dC^{atm}} \frac{dpCO_2^{ocn}}{dC^{ocn}} \exp(-t\tau^{-1}) \quad (34)$$

139 Where the first term is the regular ocean gas-exchange law under prescribed conditions (Equation  
 140 13) and the second term is the additional atmospheric  $pCO_2$  deviation due to the prescribed  $pCO_2$

141 trajectory (Equation 33). This, once again, is a linear ODE of the form  $y'(t) = gy(t) - m \exp(th)$   
 142 with the solution  $y(t) = c_1 \exp(gt) + \frac{m}{g-h} \exp(ht)$ . Again, the initial condition for this linear ODE is  
 143  $\Delta pCO_2(0) = 0$  since up to the point where the atmospheric  $pCO_2$  is prescribed, the new reference  
 144 state is identical to the original one.

145 The solution is (after simplification):

$$\Delta pCO_2(t) = \Delta C(0) \frac{dpCO_2^{ocn}}{dC^{ocn}} [\exp(-t\tau^{-1}) - \exp(-t\tau_c^{-1})] \quad (35)$$

146 Which describes the time evolution of the  $pCO_2$  difference across the air-sea interface in this  
 147 new reference simulation. The rate of  $CO_2$  transfer caused by this  $\Delta pCO_2(t)$  is then obtained from  
 148 the gas transfer law (Equation 2), i.e.

$$\frac{dC^{ocn}}{dt} = \Delta C(0) \Psi \frac{dpCO_2^{ocn}}{dC^{ocn}} [\exp(-t\tau^{-1}) - \exp(-t\tau_c^{-1})] \quad (36)$$

149 This matches exactly the sought after  $\frac{dC^{Feedback}}{dt}$ , given by Equation 32. In other words, as  
 150 suggested by Schwinger et al. (2024), the difference in  $CO_2$  ocean inventory between a simulation  
 151 with OAE under a responsive atmosphere and one where the  $pCO_2^{atm}$  trajectory is prescribed to  
 152 that of the former simulation but with no OAE applied yields the same metric (after normalization  
 153 by  $\Delta Alk$ ) as given by  $\eta(t)$ .

## 154 1.6 Supplementary figures



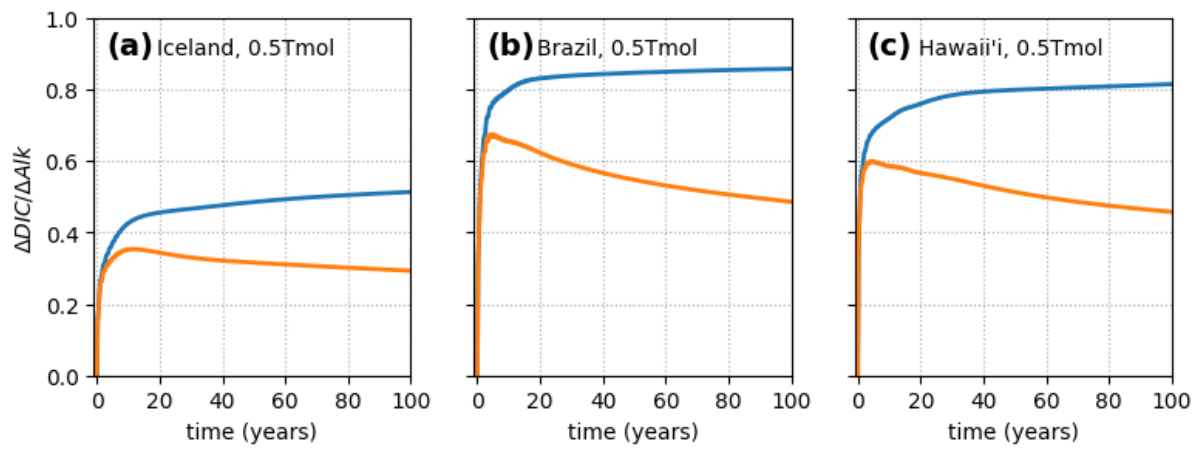

Figure S2: Increase in total ocean DIC following a 1-month pulse of alkalinity ( $\Delta Alk$ ) applied to the surface layer at a specific location, under a prescribed (non-reactive) atmosphere (blue) and a coupled (reactive) atmosphere respectively. The three different point-injection locations were off the coast of Brazil (2.50S,37.50W), near Iceland (61.50N,19.50W) and at Hawaii'i (19.02N,155.49E).

## References

- 155  
156 He, J. and Tyka, M. D. (2023). Limits and  $\text{CO}_2$  equilibration of near-coast alkalinity enhancement.  
157 *Biogeosciences*, 20(1):27–43.
- 158 Schwinger, J., Bourgeois, T., and Rickels, W. (2024). On the emission-path dependency of the  
159 efficiency of ocean alkalinity enhancement. *Environmental Research Letters*, 19(7):074067.
- 160 Suselj, K., Carroll, D., Menemenlis, D., Zhang, H., Beatty, N., Savage, A., and Whitt, D. (2024).  
161 Quantifying regional efficiency of marine carbon dioxide removal (mcd) via alkalinity enhance-  
162 ment using the ecco-darwin ocean biogeochemistry state estimate and an idealized vertical 1-d  
163 model. *submitted to Global Biogeochemical Cycles*, 123(123):123–123.
- 164 Tyka, M. D., Van Arsdale, C., and Platt, J. C. (2022).  $\text{CO}_2$  capture by pumping surface acidity to  
165 the deep ocean. *Energy Environ. Sci.*, 15:786–798.
- 166 Zeebe, R. E. and Wolf-Gladrow, D. A. (2001). *CO<sub>2</sub> in seawater: Equilibrium, kinetics, isotopes:*  
167 *Volume 65*. Elsevier Oceanography Series. Elsevier Science, London, England.
- 168 Zhou, M., Tyka, M. D., Ho, D. T., Yankovsky, E., Bachman, S., Nicholas, T., Karspeck, A. R., and  
169 Long, M. C. (2024). Mapping the global variation in the efficiency of ocean alkalinity enhancement  
170 for carbon dioxide removal. *Submitted to Nat. Clim. Change*, 123(123):123–123.
